# Supplementary material
Source: HighWire-hosted journal article supplement (https://cmaj.ca/highwire/filestream/59148/field_highwire_adjunct_files/0/184_7.pdf)
Supplement: 184_7.pdf [file 184_7.pdf]

## ÉDITORIAL

## La nouvelle stratégie fédérale en santé : distribuer les fonds et déguerpir

Matthew B. Stanbrook MD PhD

Pour la version anglaise de l'éditorial, veuillez consulter la page 741.

**L**e gouvernement du Canada a marqué la fin de l'année 2011 en anéantissant les espoirs des professionnels de la santé et de leurs patients. Quelques jours avant Noël, Jim Flaherty, ministre fédéral des Finances, révélait l'intention du gouvernement d'aller de l'avant avec son propre plan pour le financement futur du système de santé<sup>1</sup>. Le plan est dépourvu d'obligations de la part des provinces et des territoires et a été dressé sans les consulter. Le gouvernement fédéral prend les devants avec ce plan, qui, s'il est mis en application comme prévu, sabordera la renégociation tant attendue de l'accord fédéral-provincial sur la santé. Ceux d'entre nous qui s'attendaient à ce que ces négociations soient l'occasion d'enfin tenter de résoudre les problèmes systémiques des soins de santé auxquels nous et les patients sommes aux prises tous les jours seront plutôt témoins d'une autre occasion ratée de réforme du système.

Dans une annonce-surprise et à huis clos (ce qui semble être une marque distinctive de l'approche du gouvernement Harper en matière de relations fédérales-provinciales dans le domaine de la santé<sup>2</sup>), M. Flaherty a annoncé son nouveau plan à ses homologues provinciaux. Bien que le plan prévoie un accord sur les transferts fédéraux en santé jusqu'en 2024, la croissance des transferts demeurera au niveau actuel de 6 % seulement jusqu'en 2016–17. Par la suite, le taux d'augmentation sera réduit, car il sera calculé en fonction de la croissance du produit intérieur brut (PIB) nominal.

Ce financement ne sera lié à aucune incitation — pas même aux quelques rares incitations prévues dans l'accord de 2004. Ainsi, le plan ne prévoit rien pour remédier au manque d'imputabilité des provinces et des territoires face aux dépenses de santé, situation qui a toujours contrecarré les efforts pour contrôler les coûts et établir des normes nationales. Si aucune mesure compensatoire n'est prise, il existe un réel danger que les principes de la Loi canadienne sur la santé, notamment les principes d'universalité et d'intégralité des soins de santé, ne deviennent qu'un rêve lointain.

Le gouvernement fédéral affirme que son nouveau plan est financièrement responsable et établit clairement et précisément les paramètres du financement des soins de santé des provinces et territoires. Or, le fait de lier l'augmentation du taux des transferts futurs du gouvernement fédéral au rendement varié et imprévisible de l'économie semble plutôt introduire l'incertitude dans le processus. En outre, puisque le PIB du fédéral et celui des provinces et territoires ont tendance à être étroitement liés, cela signifie que l'appui financier addi-

tionnel du fédéral pour les soins de santé serait à son plus faible à un moment où les budgets provinciaux feront probablement face aux plus grandes contraintes.

Modifier les sommes transférées tout en continuant d'envoyer de l'argent aux provinces et aux territoires sans rien leur demander en retour n'est pas financièrement responsable. Le gouvernement ferait preuve de véritable responsabilité financière s'il s'attaquait plutôt aux lacunes et aux inefficacités systémiques à l'origine de l'augmentation des coûts des soins de santé. Nos patients et nous sommes confrontés à ces lacunes au quotidien : des maladies évitables chez les personnes qui n'ont pas les moyens de se procurer les médicaments efficaces; le retard et le chevauchement de traitements en raison d'un manque d'accès aux dossiers médicaux complets aux points d'intervention; des hospitalisations répétées et prolongées en raison d'un accès insuffisant aux soins de longue durée ou aux soins communautaires à un coût abordable; un système de rémunération des médecins bourré d'incitatifs étranges et non adaptés à la réalité des soins aux patients. L'accord sur la santé de 2004 promettait de remédier à certains de ces problèmes, notamment en réformant à l'échelle nationale l'assurance-médicaments et les soins primaires, mais le fait est que ces promesses n'ont pas été tenues. D'autres mesures, notamment en cybersanté, se font toujours attendre.

Selon M. Flaherty, « Nous voulons laisser de côté la question du financement pour nous concentrer sur le véritable enjeu, c'est-à-dire comment améliorer le système (...) <sup>1</sup> ». Mais ces belles paroles sonnent creux, d'autant plus qu'elles sortent de la bouche d'un gouvernement qui, pendant des années, n'a donné que peu d'indications, voire aucune, qu'il considérait l'amélioration du système de soins de santé comme une priorité. C'est pourquoi le Conseil de la Fédération a déclaré que les provinces et les territoires collaboreront de leur propre chef pour améliorer le système de santé, mais sans un leadership fédéral pour réunir les intérêts régionaux<sup>3</sup>. En outre, pour un gouvernement qui prétend sincèrement améliorer le système de santé, le plan semble plutôt naïf. Le financement étant déjà prédéterminé, le gouvernement fédéral a cédé son principal levier pour diriger les négociations d'un accord sur les réformes du système de santé.

La décision du gouvernement fédéral était sans doute motivée aussi en partie par un désir d'échapper à ce qui pourrait bien se transformer en une rude bataille politique avec les provinces. Mais quelles que soient les difficultés inhérentes, le gouvernement fédéral a indubitablement une responsabilité essentielle et inévitable à l'égard de la santé — y compris

l'établissement de normes nationales et d'équité des soins de santé dans tout le pays — pour laquelle les transferts fédéraux sont le principal outil. Plutôt que d'avoir le courage de faire preuve de leadership dans l'exercice de cette responsabilité, le gouvernement fédéral opte plutôt de traiter la renégociation de l'accord sur la santé comme une simple corvée désagréable dont il veut se débarrasser au plus vite.

Le nouveau plan fédéral de transfert est une manœuvre politique calculée au mieux pour satisfaire les intérêts des politiciens fédéraux et provinciaux. Mais en jetant de l'argent de façon irresponsable dans le système de santé sans régler aucun de ses problèmes, ce sont nous et les patients qui en ressortons perdants.

## Références

1. Bailey I, Curry B. In surprise move, Flaherty lays out health-spending plans to 2024. *Globe and Mail* [Toronto], le 19 décembre 2011. Disponible : [www.theglobeandmail.com/news/politics/in-surprise-move-flaherty-lays-out-health-spending-plans-till-2024/article2276354/](http://www.theglobeandmail.com/news/politics/in-surprise-move-flaherty-lays-out-health-spending-plans-till-2024/article2276354/) (consulté le 9 janvier 2012).
2. Stanbrook MB, Hébert PC. The federal government's senseless policy change on tobacco warning labels. *JAMC* 2010;182:1939.
3. Kennedy M. Territorial leaders, premiers agree to Medicare study. *Montreal Gazette*. Le 18 janvier 2012. Disponible : [www.montrealgazette.com/news/Territorial+leaders+premiers+agree+medicare+study/6011819/story.html](http://www.montrealgazette.com/news/Territorial+leaders+premiers+agree+medicare+study/6011819/story.html) (consulté le 18 janvier 2012).

**Intérêts concurrents :** Se rendre à [www.cmaj.ca/site/misc/cmaj\\_staff.xhtml](http://www.cmaj.ca/site/misc/cmaj_staff.xhtml)

**Affiliations :** Se rendre à [www.cmaj.ca/site/misc/cmaj\\_staff.xhtml](http://www.cmaj.ca/site/misc/cmaj_staff.xhtml)

**Correspondance à :** Éditeur du JAMC, [pubs@cmaj.ca](mailto:pubs@cmaj.ca)

## RÉSUMÉS DE RECHERCHE

# Influence de l'âge relatif sur le diagnostic et le traitement du trouble déficitaire de l'attention avec hyperactivité chez les enfants

Richard L. Morrow MA, E. Jane Garland MD, James M. Wright MD PhD, Malcolm Maclure ScD, Suzanne Taylor PharmD, Colin R. Dormuth ScD

Pour la version anglaise de ce résumé, veuillez consulter la page 755.

Cet article a été revu par les pairs.

**Correspondance à :**

Richard Morrow,  
[richard.morrow@ti.ubc.ca](mailto:richard.morrow@ti.ubc.ca).

**Contexte :** La date de naissance fixée pour l'admission à l'école en Colombie-Britannique, au Canada, est le 31 décembre. Ainsi, les enfants nés en décembre sont habituellement les plus jeunes de leur classe. Nous avons voulu déterminer, à l'intérieur d'un même niveau scolaire, l'influence de l'âge relatif sur le diagnostic et le traitement pharmacologique du trouble déficitaire de l'attention avec hyperactivité (TDAH) chez les enfants.

**Méthodes :** Nous avons procédé à une étude de cohorte regroupant 937 943 enfants de Colombie-Britannique qui avaient de 6 à 12 ans à un moment ou l'autre entre le 1<sup>er</sup> décembre 1997 et le 30 novembre 2008. Nous avons calculé le risque absolu et relatif de recevoir un diagnostic de TDAH ou de se faire prescrire un médicament pour le traitement du TDAH (p. ex., méthylphénidate, dextroamphétamine, sels mixtes d'amphétamine ou atomoxétine) chez les enfants nés en décembre en comparaison avec ceux nés en janvier.

**Résultats :** Les garçons nés en décembre étaient plus susceptibles dans une proportion de 30 %

(risque relatif [RR] 1,30; intervalle de confiance [IC] à 95 % 1,23–1,37) de recevoir un diagnostic de TDAH que les garçons nés en janvier. Les filles nées en décembre étaient plus susceptibles dans une proportion de 70 % (RR 1,70; IC à 95 % 1,53–1,88) de recevoir un diagnostic de TDAH que les filles nées en janvier. De même, les garçons étaient à 41 % plus susceptibles (RR 1,41; IC à 95 % 1,33–1,50) et les filles, à 77 % plus susceptibles (RR 1,77; IC à 95 % 1,57–2,00) de se faire prescrire un médicament pour le TDAH s'ils étaient nés en décembre plutôt qu'en janvier.

**Interprétation :** Les résultats de nos analyses montrent un effet lié à l'âge relatif pour ce qui est du diagnostic et du traitement du TDAH chez les enfants de 6 à 12 ans en Colombie-Britannique. Ces observations soulèvent des inquiétudes quant aux préjudices potentiels des diagnostics et des traitements excessifs. Ces effets négatifs incluent les réactions indésirables sur le sommeil, l'appétit et la croissance, en plus d'un risque accru à l'égard des événements cardiovasculaires.

**Intérêts concurrents :** Richard Morrow, E. Jane Garland, James Wright, Malcolm Maclure et Colin Dormuth ont reçu une subvention Catalyseur des Instituts de recherche en santé du Canada pour étudier l'innocuité et l'efficacité des médicaments après leur commercialisation. Malcolm Maclure est à l'emploi de l'Université de la Colombie-Britannique et du ministère de la Santé de la Colombie-Britannique. Suzanne Taylor est à l'emploi du ministère de la Santé de la Colombie-Britannique.
